# Supplementary material
Source: PubMed Central journal article supplement (PMC4999580)
Supplement: 40744_2016_30_MOESM1_ESM.pdf [file 40744_2016_30_MOESM1_ESM.pdf]

## Pubmed

- #1: "osteoporosis" [Mesh]
- #2: "alendronate"[Mesh]
- #3: "clodronic Acid"[Mesh]
- #4: "etidronic Acid"[Mesh]
- #5: "ibandronic acid" [Supplementary Concept]
- #6: "YM 529" [Supplementary Concept]
- #7: "6-amino-1-hydroxyhexane-1,1-diphosphonate" [Supplementary Concept]
- #8: "olpadronic acid" [Supplementary Concept]
- #9: "pamidronate" [Supplementary Concept]
- #10: "risedronic acid" [Supplementary Concept]
- #11: "tiludronic acid" [Supplementary Concept]
- #12: "zoledronic acid" [Supplementary Concept]
- #13: #2 OR #3 OR #4 OR #5 OR #6 OR #7 OR #8 OR #9 OR #10 OR #11 OR #12
- #14: #1 AND #13
- #15: #14 AND RCT filter

## Cochrane:

- #1: MeSH descriptor: [Osteoporosis] explode all trees
- #2: MeSH descriptor: [Alendronate] explode all trees
- #3: MeSH descriptor: [Clodronic Acid] explode all trees
- #4: MeSH descriptor: [Etidronic Acid] explode all trees
- #5: ibandronate
- #6: "ibandronic acid"
- #7: #5 OR #6
- #8: minodronate
- #9: neridronate
- #10: olpadronate
- #11: pamidronate
- #12: risedronate
- #13: "risedronic acid"
- #14: #12 OR #13
- #15: "tiludronic acid"
- #16: tiludronate
- #17: #15 OR #16
- #18: Zoledronate
- #19: "zoledronic acid"
- #20: #18 OR #19
- #21: #2 OR #3 OR #4 OR #7 OR #8 OR #9 OR #10 OR #11 OR #14 OR #17 OR #20
- #22: #1 AND #21
- #23: #22 AND Trial filter

## Embase:

- #1: 'osteoporosis'/exp

#2: 'alendronic acid'/exp  
#3: 'clodronic acid'/exp  
#4: 'etidronic acid'/exp  
#5: 'ibandronic acid'/exp  
#6: 'minodronic acid'/exp  
#7: 'neridronic acid'/exp  
#8: 'olpadronic acid'/exp  
#9: 'pamidronic acid'/exp  
#10: 'risedronic acid'/exp  
#11: 'tiludronic acid'/exp  
#12: 'zoledronic acid'/exp  
#13: #2 OR #3 OR #4 OR #5 OR #6 OR #7 OR #8 OR #9 OR #10 OR #11 OR #12  
#14: #1 AND #13  
#15: #14 AND RCT filter

Clinicaltrial.gov:

Alendronate

Clodronate

Etidronate

Ibandronate

Neridronate

Minodronate

Tiludronate

Olpadronate

Pamidronate

Risedronate

Zoledronic acid
