# Supplementary material
Source: PubMed Central journal article supplement (PMC4999580)
Supplement: 40744_2016_30_MOESM2_ESM.pdf [file 40744_2016_30_MOESM2_ESM.pdf]

|               | Random sequence generation (selection bias) | Allocation concealment (selection bias) | Blinding of participants and personnel (performance bias) | Blinding of outcome assessment (detection bias) | Incomplete outcome data (attrition bias) | Selective reporting (reporting bias) | Other bias |
|---------------|---------------------------------------------|-----------------------------------------|-----------------------------------------------------------|-------------------------------------------------|------------------------------------------|--------------------------------------|------------|
| Boonen 2009   | +                                           | +                                       | +                                                         | +                                               | +                                        | +                                    | ?          |
| Boonen 2012   | +                                           | +                                       | +                                                         | +                                               | +                                        | +                                    | +          |
| Cohen 1999    | +                                           | +                                       | +                                                         | +                                               | -                                        | +                                    | +          |
| Orwoll 2000   | +                                           | +                                       | +                                                         | +                                               | +                                        | +                                    | ?          |
| Orwoll 2010a  | +                                           | +                                       | +                                                         | +                                               | +                                        | +                                    | +          |
| Orwoll 2010b  | +                                           | +                                       | +                                                         | +                                               | +                                        | +                                    | +          |
| Reid 2000     | +                                           | +                                       | +                                                         | +                                               | -                                        | +                                    | ?          |
| Saag 1998     | +                                           | +                                       | +                                                         | +                                               | +                                        | +                                    | +          |
| Sambrook 2012 | +                                           | +                                       | +                                                         | +                                               | +                                        | +                                    | +          |
| Sato 2007     | +                                           | +                                       | +                                                         | +                                               | +                                        | +                                    | +          |
