# Supplementary material
Source: PubMed Central journal article supplement (PMC4999580)

Treatment effect of preventing vertebral fracture in corticosteroid-induced osteoporosis

Mean with 95%CI

Zoledronic acid vs Placebo 0.34 (0.02,5.34)

Risedronate 0.15 (0.04,0.58)

Alendronate 0.60 (0.04,9.82)

Risedronate vs Zoledronic acid 0.45 (0.04,5.00)

Alendronate 1.79 (0.04,91.17)

Alendronate vs Risedronate 4.00 (0.18,89.08)

0 .2 1 11 90

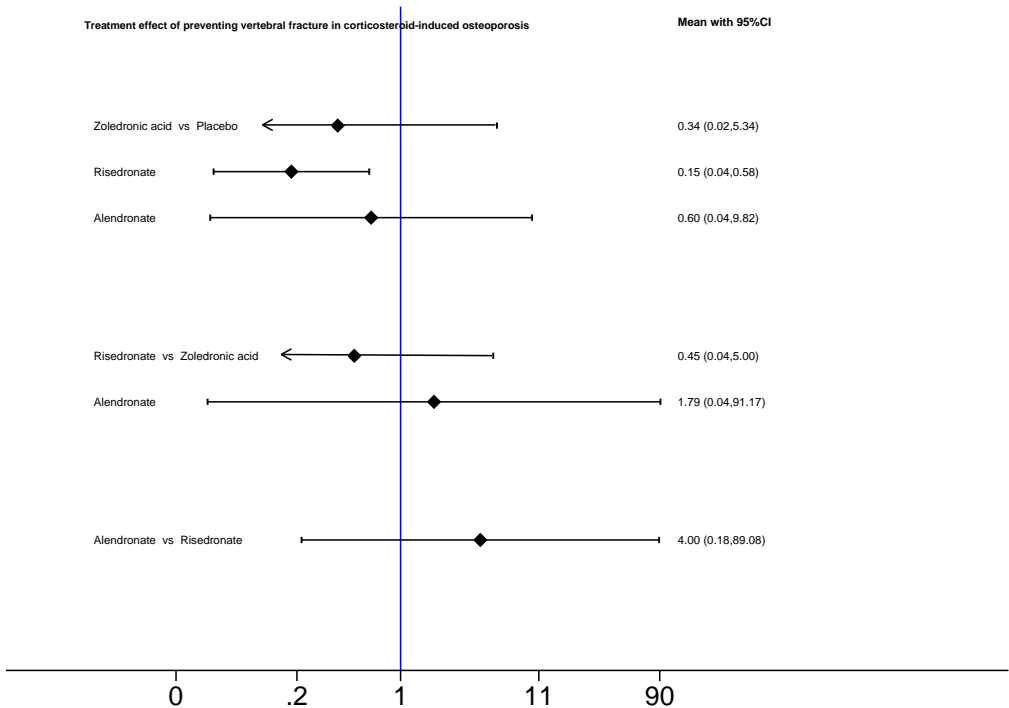

Supplement: 40744_2016_30_MOESM4_ESM.pdf [file 40744_2016_30_MOESM4_ESM.pdf]
