# Supplementary material
Source: PubMed Central journal article supplement (PMC4999580)
Supplement: 40744_2016_30_MOESM5_ESM.pdf [file 40744_2016_30_MOESM5_ESM.pdf]

Supplement 5. Sensitivity analyses.

| Primary VF      | STATA NMA        | Ranking | Sensitivity            | Ranking | ADDIS NMA         | Ranking |
|-----------------|------------------|---------|------------------------|---------|-------------------|---------|
| Zoledronic acid | 0.23(0.05,1.06)  | 1       | <b>0.29(0.15,0.57)</b> | 1       | 0.21 (0.02,1.71)  | 2       |
| Risedronate     | 2.47(0.09,69.00) | 4       | <b>0.37(0.20,0.72)</b> | 4       | NA*               | 4       |
| Alendronate     | 0.22(0.03,1.55)  | 2       | <b>0.33(0.15,0.70)</b> | 2       | 0.19 (0.01,1.84)  | 1       |
| Ibandronate     | 0.26(0.02,4.25)  | 3       | 0.26(0.02,3.00)        | 3       | 0.21 (0.00,7.86)  | 3       |
| GIOP VF         | STATA NMA        |         | Sensitivity            | Ranking | ADDIS NMA         | Ranking |
| Zoledronic acid | 0.34(0.02,5.34)  | 2       | NA                     | NA      | 0.32 (0.01,25.03) | 2       |
| Risedronate     | 0.15(0.04,0.58)  | 1       | NA                     | NA      | 0.12 (0.01,0.99)  | 1       |
| Alendronate     | 0.60(0.04,9.82)  | 3       | NA                     | NA      | 0.62 (0.01,39.20) | 3       |
| Primary NVF     | STATA NMA        |         | Sensitivity            | Ranking | ADDIS NMA         | Ranking |
| Zoledronic acid | NA §             | NA §    | 0.65(0.21,1.99)        | 2       | 0.62 (0.11,3.37)  | 2       |
| Risedronate     | NA §             | NA §    | 0.50(0.29,0.86)        | 1       | 0.53 (0.10,2.99)  | 1       |
| Alendronate     | NA §             | NA §    | 0.77(0.23,2.60)        | 3       | 0.78 (0.13,4.65)  | 3       |
| Ibandronate     | NA §             | NA §    | 2.26(0.10,51.19)       | 4       | NA*               | 4       |

NA: Not available

§ Results from frequentist model is not available since data is too sparse to estimate heterogeneity.

\*: Unstable data with 0 event happen when performing network meta-analysis using Bayesian model.
