# Supplementary material
Source: PubMed Central journal article supplement (PMC4999580)

Treatment effect in preventing vertebral fracture in primary osteoporosis

Mean with 95%CI

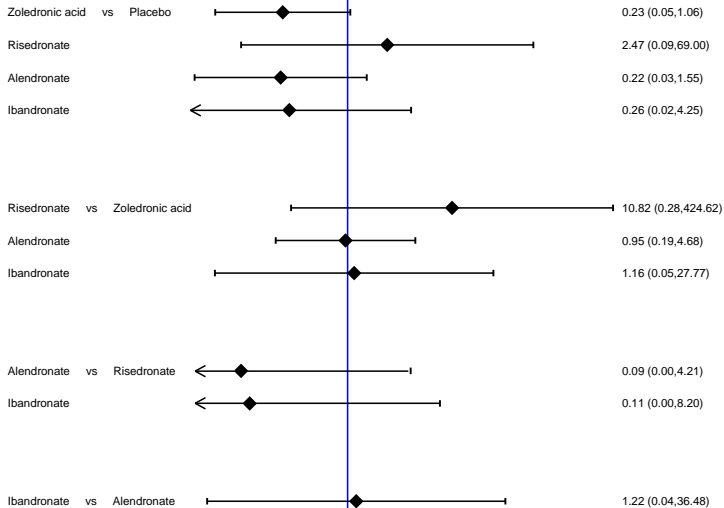

0

0.03

1

18

446

Supplement: 40744_2016_30_MOESM3_ESM.pdf [file 40744_2016_30_MOESM3_ESM.pdf]
